# Supplementary material for: Metabolomics approach to identify therapeutically potential biomarkers of the Zhi-Zi-Da-Huang decoction effect on the hepatoprotective mechanism
Source: Royal Society of Chemistry journal article supplement (doi:10.1039/c5ra16563f), 2015-01-01
Supplement: c5ra16563f1.pdf [file c5ra16563f1.pdf]

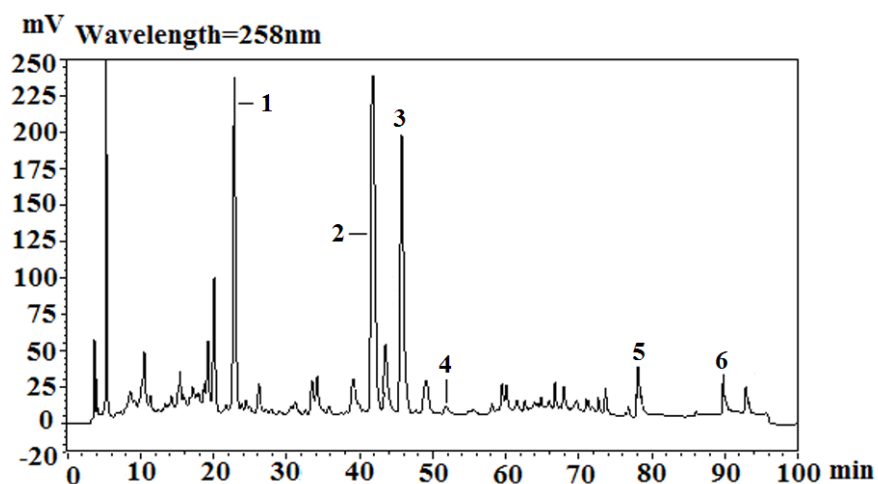

**Fig. S1** HPLC fingerprint of Zhi-Zi-Da-Huang Decoction (ZZDHD) (258nm). Mobile phase: (A) 0.1% formic acid; (B) methanol; non-linear gradient elution. Peaks: (1) geniposide; (2) naringin; (3) neohesperidin; (4) daidzein; (5) rhein; (6) emodin.

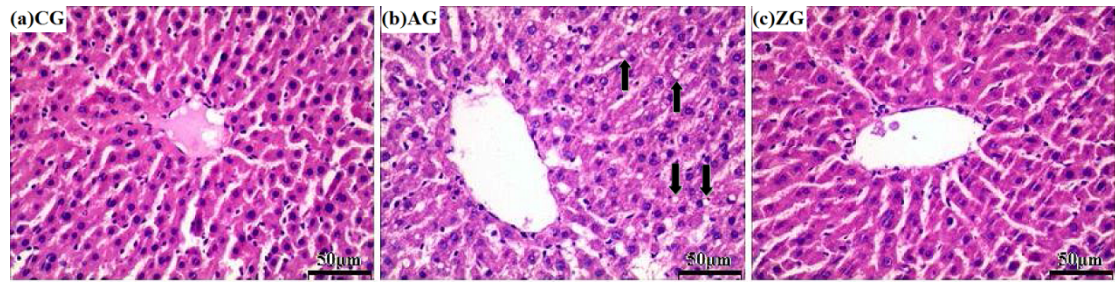

**Fig. S2** Histopathology of liver of rats from control group (CG), alcohol group (AG) and ZZZDHD (ZG). Here are seen the lipid vacuoles within hepatocytes, and some typical fat particles were represented by arrows.
